# Supplementary material for: Selective Anti-Leishmanial Strathclyde Minor Groove Binders Using an N-Oxide Tail-Group Modification
Source: MDPI journal article supplement (doi:10.3390/ijms231911912), 2022-10-07
Supplement: s1 [file s1]

## Selective Anti-Leishmanial Strathclyde Minor Groove Binders Using an N-Oxide Tail Group Modification

Marina C. Perieteanu<sup>1</sup>, Leah M.C. McGee<sup>1</sup>, Craig D. Shaw<sup>2</sup>, Donna MacMillan<sup>1</sup>, Abedawn I. Khalaf<sup>1</sup>, Kirsten Gillingwater<sup>3,4</sup>, Rebecca Beveridge<sup>1</sup>, Katherine C. Carter<sup>2</sup>, Colin J. Suckling<sup>1</sup>, Fraser J. Scott<sup>1,\*</sup>

<sup>1</sup>Department of Pure and Applied Chemistry, University of Strathclyde, Glasgow G1 1XL, United Kingdom

<sup>2</sup>Strathclyde Institute of Pharmacy & Biomedical Sciences, University of Strathclyde, Glasgow, G4 0RE, United Kingdom

<sup>3</sup>Parasite Chemotherapy, Department of Medical Parasitology and Infection Biology, Swiss Tropical and Public Health Institute, Basel 4051, Switzerland

<sup>4</sup>University of Basel, Basel 4001, Switzerland

## Supplementary Information

**Table S1.** Calculated and measured masses for each species observed in **Figure 4** for DNA sequence 5'-CGCATATATGCG-3' **S-MGB-219**.

| Species                                   | m/z value   | Calculated mass of neutral species (Da) |
|-------------------------------------------|-------------|-----------------------------------------|
| Single Stranded [SS]                      | 3- : 1214.1 | $(1214.1 \times 3) + 3 = 3645.3$        |
|                                           | 4- : 910.3  | $(910.3 \times 4) + 4 = 3645.2$         |
| Double Stranded [DS]                      | 4- : 1821.7 | $(1821.7 \times 4) + 4 = 7290.8$        |
|                                           | 5- : 1457.2 | $(1457.2 \times 5) + 5 = 7291.0$        |
| *Double Stranded + 2 x S-MGB-219 [DS+2M]* | 4- : 2144.6 | $(2144.6 \times 4) + 4 = 8582.4$        |
|                                           | 5- : 1715.5 | $(1715.5 \times 5) + 5 = 8582.5$        |

**Table S2.** Calculated and measured masses for each species observed in **Figure 4** for DNA sequence 5'-CGCATATATGCG-3' **S-MGB-BP-3**.

| Species | m/z value | Calculated mass of neutral species (Da) |
|---------|-----------|-----------------------------------------|
|---------|-----------|-----------------------------------------|

|                                                       |             |                                  |
|-------------------------------------------------------|-------------|----------------------------------|
| <b>Single Stranded [SS]</b>                           | 3- : 1214.1 | $(1214.1 \times 3) + 3 = 3645.3$ |
|                                                       | 4- : 910.3  | $(910.3 \times 4) + 4 = 3645.2$  |
| <b>Double Stranded [DS]</b>                           | 4- : 1821.7 | $(1821.7 \times 4) + 4 = 7290.8$ |
|                                                       | 5- : 1457.2 | $(1457.2 \times 5) + 5 = 7291.0$ |
| <b>*Double Stranded + 2 x<br/>S-MGB-BP-3 [DS+2M]*</b> | 4- : 2137.2 | $(2137.2) + 4 = 8552.8$          |
|                                                       | 5- : 1709.6 | $(1709.6 \times 5) + 5 = 8553.0$ |

For all species, the expected mass corresponds to the left-hand side of the m/z peaks.
